# Supplementary material for: Nanoparticle Size Effect on Water Vapour Adsorption by Hydroxyapatite
Source: PubMed Central journal article supplement (PMC6669690; doi:10.3390/nano9071005), 2019-07-12
Supplement: nanomaterials-09-01005-s001.pdf [file nanomaterials-09-01005-s001.pdf]

# Nanoparticle Size Effect on Water Vapour Adsorption by Hydroxyapatite

Urszula Szalaj<sup>1,2,\*</sup>, Anna Świdowska-Środa<sup>1</sup>, Agnieszka Chodara<sup>1,2</sup>, Stanisław Gierlotka<sup>1</sup> and Witold Łojkowski<sup>1</sup>

<sup>1</sup> Institute of High Pressure Physics, Polish Academy of Sciences, Sokołowska 29/37, 01-142 Warsaw, Poland

<sup>2</sup> Faculty of Materials Engineering, Warsaw University of Technology, Wołoska 41, 02-507 Warsaw, Poland

\* Correspondence: u.szalaj@labnano.pl; Tel.: +48-22-876-04-31

The average pore width was calculated by the Barrett-Joyner-Halenda (BJH) method using adsorption isotherms at the  $P/P_0$  range of 0.001–0.99. The Adsorption Isotherm was determined using the helium pycnometer at the temperature of  $24 \pm 1$  °C (ISO 12154:2014, AccuPyc II 1340 FoamPyc V1.06, Micromeritics, USA). The total pore volume of samples was estimated from the amount of adsorbed nitrogen at  $P/P_0 = 0.9896$ . The obtained data of the adsorption isotherms were analysed by us using the MicroActive software V4.03 (Interactive Data Analysis Software, Micromeritics).

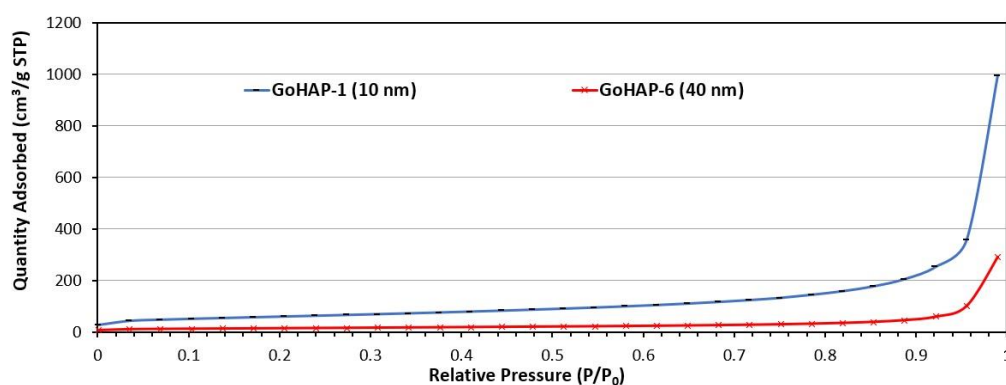

**Figure S1.** Nitrogen adsorption isotherms of GoHAP<sup>TM</sup>. STP means standard temperature and pressure.

**Table S1.** Characteristics of GoHAP™ samples.

| Sample          | Specific Surface Area by Gas Adsorption, $a_s \pm \sigma$ (m <sup>2</sup> /g) | BJH Adsorption Average Pore Width (Å) | Total Pore Volume at P/P <sub>0</sub> =0.9896 (cm <sup>3</sup> /g) | Skeleton Density by Gas Pycnometry, $\rho_s \pm \sigma$ (g/cm <sup>3</sup> ) |
|-----------------|-------------------------------------------------------------------------------|---------------------------------------|--------------------------------------------------------------------|------------------------------------------------------------------------------|
| GoHAP-1 (10 nm) | 209 ± 1                                                                       | 292.2                                 | 1.538                                                              | 2.87 ± 0.01                                                                  |
| GoHAP-6 (40 nm) | 49.7                                                                          | 319.9                                 | 0.451                                                              | 3.09 ± 0.01                                                                  |

Table S2 shows the results of the Specific Surface Area and Skeleton Density measurement before and after the Adsorption-Desorption-Adsorption-Desorption cycle (A-D-A-D cycle).

**Table S2.** Characteristics of GoHAP™ samples.

| Sample Name                         | Specific Surface Area by Gas Adsorption SSA (m <sup>2</sup> /g) | Skeleton Density by Gas Pycnometry, DEN ± $\sigma$ (g/cm <sup>3</sup> ) |
|-------------------------------------|-----------------------------------------------------------------|-------------------------------------------------------------------------|
| GoHAP-1 (10 nm)                     | 206 ± 1                                                         | 2.87 ± 0.02                                                             |
| GoHAP-1 (10 nm) after A-D-A-D cycle | 209 ± 1                                                         | 2.92 ± 0.02                                                             |
| GoHAP-6 (40 nm)                     | 49 ± 1                                                          | 3.09 ± 0.01                                                             |
| GoHAP-6 (40nm) after A-D-A-D cycle  | 49 ± 1                                                          | 3.09 ± 0.01                                                             |
